# Supplementary material
Source: publisher figshare collection journal article supplement (https://acs.figshare.com/ndownloader/files/4382443)
Supplement: Supplementary file 1 [file 4382443]

#============================================================================== 

data_New_Global_Publ_Block

# Added by publCIF - use a unique identifier for each data block

#==============================================================================


# SUBMISSION DETAILS

_publ_contact_author_name            
'Thomas M. Klap�tke'   # Name of author for correspondence
_publ_contact_author_address             # Address of author for correspondence
;
Ludwig-Maximilian University,
Department of Chemistry,
Butenandtstrasse 5-13 (Haus D), 
D-81377 Munich
;

_publ_contact_author_email           ?
_publ_contact_author_fax             ?
_publ_contact_author_phone           ?

_publ_contact_letter
;
Please consider this CIF for publication. I certify that this contibution is the
original work of those listed as authors; that it has not been published
before (in any language or medium) and is not being considered for publication
elsewhere; that all authors concur with and are aware of the submission; that
all workers involved in the study are listed as authors or given proper credit
in the acknowledgements; that I have obtained permission for and acknowledged
the source of any excerpts from other copyright works; and that to the best of
my knowledge the paper contains no statements which are libellous, unlawful or
in any way actionable. All coauthors have made significant scientific
contributions to the work reported, including the ideas and their execution,
and share responsibility and accountability for the results.
;
   
_publ_requested_journal              'J. Am. Chem. Soc.'
_publ_requested_category             ?   

#==============================================================================

# TITLE AND AUTHOR LIST

_publ_section_title
;
triaminoguanidinium 5-nitro-2H-tetrazol-2-olate
;
_publ_section_title_footnote  # remove if not required
; ?
;         
 
# The loop structure below should contain the names and addresses of all 
# authors, in the required order of publication. Repeat as necessary.

# NB if using publCIF, the Author database tool might prove useful
# (see the Tools menu in publCIF)

loop_
_publ_author_name
_publ_author_address
_publ_author_footnote
'G�bel, Michael'
;
Ludwig-Maximilian University,
Department of Chemistry,
Butenandtstrasse 5-13 (Haus D), 
D-81377 Munich
;
.
'Klap�tke, Thomas M.'
;
Ludwig-Maximilian University,
Department of Chemistry,
Butenandtstrasse 5-13 (Haus D), 
D-81377 Munich
;
.
'Piercey, Davin G.'
;
Ludwig-Maximilian University,
Department of Chemistry,
Butenandtstrasse 5-13 (Haus D), 
D-81377 Munich
;
.


#==============================================================================

# TEXT

_publ_section_synopsis
;
?
;
_publ_section_abstract
;
?
;
_publ_section_comment
;
The stucture of the title compound, (I), is shown below. Dimensions are
available in the archived CIF.

For related literature, see [type here to add references to related
literature].
;
_publ_section_acknowledgements 	# remove if not required
;
?
;
_publ_section_references
;
?
;
_publ_section_figure_captions
;
?
;
_publ_section_exptl_prep
;
?
;
_publ_section_exptl_refinement
;
?
;
#==============================================================================
_publ_manuscript_text
# Used for convenience to store draft or replaced versions
# of the abstract, comment etc.
# Its contents will not be output
;
?
;

#==============================================================================

# Formatted by publCIF

 
data_xprep

_audit_update_record
;
2010-07-06 # Formatted by publCIF
;
 
_audit_creation_method            SHELXL-97
_chemical_name_systematic
;
 triaminoguanidinium 5-nitro-2H-tetrazol-2-olate
;
_chemical_name_common             "TAGNTX"
_chemical_melting_point           ?
_chemical_formula_moiety          ?
_chemical_formula_sum
 'C2 H9 N11 O3'
_chemical_formula_weight          235.20
 
loop_
 _atom_type_symbol
 _atom_type_description
 _atom_type_scat_dispersion_real
 _atom_type_scat_dispersion_imag
 _atom_type_scat_source
 'C'  'C'   0.0033   0.0016
 'International Tables Vol C Tables 4.2.6.8 and 6.1.1.4'
 'H'  'H'   0.0000   0.0000
 'International Tables Vol C Tables 4.2.6.8 and 6.1.1.4'
 'N'  'N'   0.0061   0.0033
 'International Tables Vol C Tables 4.2.6.8 and 6.1.1.4'
 'O'  'O'   0.0106   0.0060
 'International Tables Vol C Tables 4.2.6.8 and 6.1.1.4'
 
_symmetry_cell_setting            monoclinic
_symmetry_space_group_name_H-M    P21/c
 
loop_
 _symmetry_equiv_pos_as_xyz
 'x, y, z'
 '-x, y+1/2, -z+1/2'
 '-x, -y, -z'
 'x, -y-1/2, z-1/2'
 
_cell_length_a                    10.267(3)
_cell_length_b                    12.622(2)
_cell_length_c                    7.370(3)
_cell_angle_alpha                 90.000
_cell_angle_beta                  93.724(5)
_cell_angle_gamma                 90.000
_cell_volume                      953.1(5)
_cell_formula_units_Z             4
_cell_measurement_temperature     173(2)
_cell_measurement_reflns_used     9798
_cell_measurement_theta_min       4.26
_cell_measurement_theta_max       30.11
 
_exptl_crystal_description        'block'
_exptl_crystal_colour             'colourless'
_exptl_crystal_size_max           0.3
_exptl_crystal_size_mid           0.3
_exptl_crystal_size_min           0.25
_exptl_crystal_density_meas       ?
_exptl_crystal_density_diffrn     1.639
_exptl_crystal_density_method     'not measured'
_exptl_crystal_F_000              488
_exptl_absorpt_coefficient_mu     0.143
_exptl_absorpt_correction_type    none
_exptl_absorpt_correction_T_min   ?
_exptl_absorpt_correction_T_max   ?
_exptl_absorpt_process_details    ?
 
_exptl_special_details
;
 ?
;
 
_diffrn_ambient_temperature       173(2)
_diffrn_radiation_wavelength      0.71073
_diffrn_radiation_type            MoK\a
_diffrn_radiation_source          'fine-focus sealed tube'
_diffrn_radiation_monochromator   graphite
_diffrn_measurement_device_type   'Oxford Diffraction Xcalibur3 CCD'
_diffrn_measurement_method        'omega scan'
_diffrn_detector_area_resol_mean  ?
_diffrn_standards_number          ?
_diffrn_standards_interval_count  ?
_diffrn_standards_interval_time   ?
_diffrn_standards_decay_%         ?
_diffrn_reflns_number             9798
_diffrn_reflns_av_R_equivalents   0.0356
_diffrn_reflns_av_sigmaI/netI     0.0472
_diffrn_reflns_limit_h_min        -14
_diffrn_reflns_limit_h_max        14
_diffrn_reflns_limit_k_min        -17
_diffrn_reflns_limit_k_max        12
_diffrn_reflns_limit_l_min        -10
_diffrn_reflns_limit_l_max        10
_diffrn_reflns_theta_min          4.26
_diffrn_reflns_theta_max          30.11
_reflns_number_total              2792
_reflns_number_gt                 1815
_reflns_threshold_expression      >2\s(I)
 
_computing_data_collection        ?
_computing_cell_refinement        ?
_computing_data_reduction         ?
_computing_structure_solution     ?
_computing_structure_refinement   'SHELXL-97 (Sheldrick, 1997)'
_computing_molecular_graphics     ?
_computing_publication_material   ?
 
_refine_special_details
;
 Refinement of F^2^ against ALL reflections.  The weighted R-factor wR and
 goodness of fit S are based on F^2^, conventional R-factors R are based
 on F, with F set to zero for negative F^2^. The threshold expression of
 F^2^ > 2\s(F^2^) is used only for calculating R-factors(gt) etc. and is
 not relevant to the choice of reflections for refinement.  R-factors based
 on F^2^ are statistically about twice as large as those based on F, and R-
 factors based on ALL data will be even larger.
;
 
_refine_ls_structure_factor_coef  Fsqd
_refine_ls_matrix_type            full
_refine_ls_weighting_scheme       calc
_refine_ls_weighting_details
 'calc w=1/[\s^2^(Fo^2^)+(0.0396P)^2^+0.0000P] where P=(Fo^2^+2Fc^2^)/3'
_atom_sites_solution_primary      direct
_atom_sites_solution_secondary    difmap
_atom_sites_solution_hydrogens    geom
_refine_ls_hydrogen_treatment     refall
_refine_ls_extinction_method      none
_refine_ls_extinction_coef        ?
_refine_ls_number_reflns          2792
_refine_ls_number_parameters      181
_refine_ls_number_restraints      0
_refine_ls_R_factor_all           0.0607
_refine_ls_R_factor_gt            0.0332
_refine_ls_wR_factor_ref          0.0753
_refine_ls_wR_factor_gt           0.0699
_refine_ls_goodness_of_fit_ref    0.880
_refine_ls_restrained_S_all       0.880
_refine_ls_shift/su_max           0.000
_refine_ls_shift/su_mean          0.000
 
loop_
 _atom_site_label
 _atom_site_type_symbol
 _atom_site_fract_x
 _atom_site_fract_y
 _atom_site_fract_z
 _atom_site_U_iso_or_equiv
 _atom_site_adp_type
 _atom_site_occupancy
 _atom_site_symmetry_multiplicity
 _atom_site_calc_flag
 _atom_site_refinement_flags
 _atom_site_disorder_assembly
 _atom_site_disorder_group
C1 C 0.35466(10) 0.61604(8) 0.62834(14) 0.0208(2) Uani 1 1 d . . .
C2 C 0.15836(10) 0.25770(8) 0.79469(14) 0.0219(2) Uani 1 1 d . . .
O1 O 0.12096(7) 0.56612(6) 0.90102(10) 0.0284(2) Uani 1 1 d . . .
O2 O 0.53198(7) 0.62774(7) 0.45791(11) 0.0361(2) Uani 1 1 d . . .
O3 O 0.34047(8) 0.61781(7) 0.31907(11) 0.0392(2) Uani 1 1 d . . .
N1 N 0.23028(8) 0.58755(7) 0.64036(11) 0.0224(2) Uani 1 1 d . . .
N2 N 0.22391(8) 0.59269(7) 0.81967(12) 0.0222(2) Uani 1 1 d . . .
N3 N 0.33445(10) 0.62312(8) 0.90916(13) 0.0328(2) Uani 1 1 d . . .
N4 N 0.42064(9) 0.63761(8) 0.78275(13) 0.0294(2) Uani 1 1 d . . .
N5 N 0.41230(9) 0.62136(7) 0.45639(12) 0.0254(2) Uani 1 1 d . . .
N6 N 0.07949(9) 0.34121(8) 0.77718(13) 0.0271(2) Uani 1 1 d . . .
N7 N 0.11182(10) 0.16169(8) 0.75544(14) 0.0288(2) Uani 1 1 d . . .
N8 N 0.28338(9) 0.26838(8) 0.84786(13) 0.0271(2) Uani 1 1 d . . .
N9 N 0.33295(10) 0.36939(8) 0.89712(15) 0.0271(2) Uani 1 1 d . . .
N10 N -0.05450(9) 0.32052(8) 0.73783(16) 0.0300(2) Uani 1 1 d . . .
N11 N 0.20035(10) 0.07593(8) 0.77189(16) 0.0302(2) Uani 1 1 d . . .
H6 H 0.1054(12) 0.4015(10) 0.8146(16) 0.029(3) Uiso 1 1 d . . .
H7 H 0.0296(14) 0.1522(10) 0.7167(17) 0.036(4) Uiso 1 1 d . . .
H8 H 0.3295(13) 0.2126(12) 0.8550(18) 0.041(4) Uiso 1 1 d . . .
H9A H 0.3987(12) 0.3844(10) 0.8271(17) 0.032(4) Uiso 1 1 d . . .
H9B H 0.3716(12) 0.3641(10) 1.0126(18) 0.031(3) Uiso 1 1 d . . .
H10A H -0.0827(13) 0.3539(11) 0.6346(18) 0.036(4) Uiso 1 1 d . . .
H10B H -0.0999(13) 0.3452(11) 0.8271(18) 0.040(4) Uiso 1 1 d . . .
H11A H 0.1949(12) 0.0386(11) 0.6690(19) 0.037(4) Uiso 1 1 d . . .
H11B H 0.1771(12) 0.0362(11) 0.8667(18) 0.039(4) Uiso 1 1 d . . .
 
loop_
 _atom_site_aniso_label
 _atom_site_aniso_U_11
 _atom_site_aniso_U_22
 _atom_site_aniso_U_33
 _atom_site_aniso_U_23
 _atom_site_aniso_U_13
 _atom_site_aniso_U_12
C1 0.0192(5) 0.0210(5) 0.0220(5) -0.0005(4) -0.0012(4) -0.0015(4)
C2 0.0206(5) 0.0249(5) 0.0199(5) 0.0005(4) -0.0001(4) 0.0009(4)
O1 0.0244(4) 0.0311(4) 0.0305(4) 0.0032(3) 0.0083(3) 0.0018(3)
O2 0.0216(4) 0.0511(6) 0.0358(5) -0.0024(4) 0.0050(3) -0.0086(4)
O3 0.0352(5) 0.0599(6) 0.0217(4) 0.0021(4) -0.0051(4) -0.0153(5)
N1 0.0203(4) 0.0248(4) 0.0217(5) 0.0010(4) -0.0018(3) -0.0006(4)
N2 0.0231(5) 0.0216(4) 0.0220(5) 0.0001(4) 0.0013(4) 0.0021(4)
N3 0.0285(5) 0.0446(6) 0.0248(5) -0.0040(4) -0.0016(4) -0.0056(5)
N4 0.0244(5) 0.0390(6) 0.0243(5) -0.0026(4) -0.0020(4) -0.0061(4)
N5 0.0233(5) 0.0276(5) 0.0250(5) -0.0003(4) -0.0001(4) -0.0060(4)
N6 0.0193(5) 0.0230(5) 0.0381(6) -0.0038(4) -0.0058(4) 0.0006(4)
N7 0.0193(5) 0.0228(5) 0.0432(6) -0.0031(4) -0.0061(4) 0.0024(4)
N8 0.0204(5) 0.0233(5) 0.0369(6) -0.0014(4) -0.0043(4) 0.0010(4)
N9 0.0224(5) 0.0276(5) 0.0310(6) -0.0032(4) -0.0015(4) -0.0049(4)
N10 0.0194(5) 0.0307(6) 0.0390(6) -0.0024(5) -0.0048(4) 0.0036(4)
N11 0.0276(5) 0.0231(5) 0.0392(6) -0.0004(5) -0.0013(4) 0.0045(4)
 
_geom_special_details
;
 All s.u.'s (except the s.u. in the dihedral angle between two l.s. planes)
 are estimated using the full covariance matrix.  The cell s.u.'s are taken
 into account individually in the estimation of s.u.'s in distances, angles
 and torsion angles; correlations between s.u.'s in cell parameters are only
 used when they are defined by crystal symmetry.  An approximate (isotropic)
 treatment of cell s.u.'s is used for estimating s.u.'s involving l.s. planes.
;
 
loop_
 _geom_bond_atom_site_label_1
 _geom_bond_atom_site_label_2
 _geom_bond_distance
 _geom_bond_site_symmetry_2
 _geom_bond_publ_flag
C1 N4 1.3145(15) . ?
C1 N1 1.3352(14) . ?
C1 N5 1.4346(16) . ?
C2 N8 1.3244(15) . ?
C2 N7 1.3276(15) . ?
C2 N6 1.3303(14) . ?
O1 N2 1.2929(12) . ?
O2 N5 1.2307(13) . ?
O3 N5 1.2138(13) . ?
N1 N2 1.3289(15) . ?
N2 N3 1.3316(14) . ?
N3 N4 1.3384(14) . ?
N6 N10 1.4117(15) . ?
N6 H6 0.847(13) . ?
N7 N11 1.4136(14) . ?
N7 H7 0.882(14) . ?
N8 N9 1.4116(14) . ?
N8 H8 0.849(14) . ?
N9 H9A 0.896(13) . ?
N9 H9B 0.918(13) . ?
N10 H10A 0.901(14) . ?
N10 H10B 0.887(14) . ?
N11 H11A 0.891(14) . ?
N11 H11B 0.904(14) . ?
 
loop_
 _geom_angle_atom_site_label_1
 _geom_angle_atom_site_label_2
 _geom_angle_atom_site_label_3
 _geom_angle
 _geom_angle_site_symmetry_1
 _geom_angle_site_symmetry_3
 _geom_angle_publ_flag
N4 C1 N1 116.08(10) . . ?
N4 C1 N5 122.42(10) . . ?
N1 C1 N5 121.49(9) . . ?
N8 C2 N7 119.05(10) . . ?
N8 C2 N6 121.35(10) . . ?
N7 C2 N6 119.60(10) . . ?
N2 N1 C1 99.31(8) . . ?
O1 N2 N1 122.89(9) . . ?
O1 N2 N3 122.77(10) . . ?
N1 N2 N3 114.28(9) . . ?
N2 N3 N4 105.99(9) . . ?
C1 N4 N3 104.33(10) . . ?
O3 N5 O2 124.21(10) . . ?
O3 N5 C1 118.15(10) . . ?
O2 N5 C1 117.64(9) . . ?
C2 N6 N10 116.89(10) . . ?
C2 N6 H6 120.3(9) . . ?
N10 N6 H6 121.0(8) . . ?
C2 N7 N11 117.38(10) . . ?
C2 N7 H7 121.2(9) . . ?
N11 N7 H7 121.4(9) . . ?
C2 N8 N9 119.63(10) . . ?
C2 N8 H8 117.4(10) . . ?
N9 N8 H8 122.9(10) . . ?
N8 N9 H9A 108.4(8) . . ?
N8 N9 H9B 107.4(8) . . ?
H9A N9 H9B 104.7(11) . . ?
N6 N10 H10A 110.0(8) . . ?
N6 N10 H10B 109.6(9) . . ?
H10A N10 H10B 107.9(13) . . ?
N7 N11 H11A 109.1(8) . . ?
N7 N11 H11B 106.8(8) . . ?
H11A N11 H11B 111.0(13) . . ?
 
loop_
 _geom_torsion_atom_site_label_1
 _geom_torsion_atom_site_label_2
 _geom_torsion_atom_site_label_3
 _geom_torsion_atom_site_label_4
 _geom_torsion
 _geom_torsion_site_symmetry_1
 _geom_torsion_site_symmetry_2
 _geom_torsion_site_symmetry_3
 _geom_torsion_site_symmetry_4
 _geom_torsion_publ_flag
N4 C1 N1 N2 -0.30(12) . . . . ?
N5 C1 N1 N2 179.01(9) . . . . ?
C1 N1 N2 O1 -176.41(9) . . . . ?
C1 N1 N2 N3 0.80(11) . . . . ?
O1 N2 N3 N4 176.19(9) . . . . ?
N1 N2 N3 N4 -1.02(12) . . . . ?
N1 C1 N4 N3 -0.27(13) . . . . ?
N5 C1 N4 N3 -179.58(9) . . . . ?
N2 N3 N4 C1 0.73(12) . . . . ?
N4 C1 N5 O3 -167.86(11) . . . . ?
N1 C1 N5 O3 12.87(15) . . . . ?
N4 C1 N5 O2 13.14(15) . . . . ?
N1 C1 N5 O2 -166.13(10) . . . . ?
N8 C2 N6 N10 -173.72(10) . . . . ?
N7 C2 N6 N10 7.39(15) . . . . ?
N8 C2 N7 N11 -0.48(16) . . . . ?
N6 C2 N7 N11 178.44(10) . . . . ?
N7 C2 N8 N9 -177.43(10) . . . . ?
N6 C2 N8 N9 3.67(16) . . . . ?
 
_diffrn_measured_fraction_theta_max    0.993
_diffrn_reflns_theta_full              30.11
_diffrn_measured_fraction_theta_full   0.993
_refine_diff_density_max    0.282
_refine_diff_density_min   -0.217
_refine_diff_density_rms    0.045
